# Supplementary material for: Validity and Reliability of the Baby and Child Eating Behavior Questionnaire, Toddler Version (BEBQ-Mex and CEBQ-T-Mex) in a Low Sociodemographic Sample Recruited in a Mexican Hospital
Source: MDPI journal article supplement (doi:10.3390/bs11120168), 2021-12-02
Supplement: s1 [file s1]

# Validity and Reliability of the Baby and Child Eating Behavior Questionnaire, Toddler Version (BEBQ-Mex and CEBQ-T-Mex) in a Low Sociodemographic Sample Recruited in a Mexican Hospital

Claudia Hunot-Alexander <sup>1,†</sup>, Jocelyn González-Toribio <sup>1,†</sup>, Edgar Manuel Vásquez-Garibay <sup>1,\*</sup>, Alfredo Larrosa-Haro <sup>1</sup>, Erika Casillas-Toral <sup>2</sup> and Carmen Patricia Curiel-Curiel <sup>1</sup>

## Supplementary Information S1

Table S1. Full set of BEBQ concurrent version and BEBQ-Mex items.

| BEBQ <sup>1</sup>                                                                                                                                                                                                                                                                                                                                        | Subscales              |                           | BEBQ-Mex <sup>2</sup>                                                                                                                                                                                                                                                                                                                                                                                               |
|----------------------------------------------------------------------------------------------------------------------------------------------------------------------------------------------------------------------------------------------------------------------------------------------------------------------------------------------------------|------------------------|---------------------------|---------------------------------------------------------------------------------------------------------------------------------------------------------------------------------------------------------------------------------------------------------------------------------------------------------------------------------------------------------------------------------------------------------------------|
| Food Approach subscales; Sub-escalas pro-ingestión                                                                                                                                                                                                                                                                                                       |                        |                           |                                                                                                                                                                                                                                                                                                                                                                                                                     |
| My baby frequently wants more milk than I provide<br>If allowed to, my baby would take too much milk<br>Even when my baby has just eaten well he/she is happy to feed again if offered<br>My baby is always demanding a feed<br>If given the chance, my baby would always be feeding<br>My baby can easily take a feed within 30 minutes of the last one | Food Responsiveness    | Respuesta a los Alimentos | Mi bebé frecuentemente quiere más leche de la que puedo darle<br>Si se le permitiera, mi bebe toma demasiada leche<br>Aun cuando mi bebe ha comido bien, estaría contento(a) de volver a comer si se le ofreciera<br>Mi bebe siempre está demandando una comida/tetada<br>Si le diera chance, mi bebe siempre estaría comiendo<br>Mi bebe puede fácilmente volver a comer a los 30 minutos de la última tetada/toma |
| My baby seems contented while feeding<br>My baby loves milk<br>My baby becomes distressed while feeding<br>My baby enjoys feeding time                                                                                                                                                                                                                   | Enjoyment of Food      | Disfrute de los Alimentos | Mi bebé parece contento mientras come<br>A mi bebe le encanta la leche<br>Mi bebe se angustia/aflige mientras come*<br>Mi bebe disfruta la hora de comer                                                                                                                                                                                                                                                            |
| Food Avoidance subscales; Sub-escalas anti-ingestión                                                                                                                                                                                                                                                                                                     |                        |                           |                                                                                                                                                                                                                                                                                                                                                                                                                     |
| My baby gets full up easily<br>My baby gets full before taking all the milk I think he/she should have<br>My baby finds it difficult to manage a complete feed                                                                                                                                                                                           | Satiety Responsiveness | Respuesta a la Saciedad   | Mi bebe se siente lleno(a) fácilmente<br>Mi bebe se llena antes de tomar toda la leche que yo pensaba que debía recibir<br>A mi bebe le cuesta trabajo terminarse una tetada/una comida completa                                                                                                                                                                                                                    |
| My baby finishes feeding quickly<br>My baby takes more than 30 minutes to finish feeding<br>My baby feeds slowly<br>My baby sucks more and more slowly during the course of a feed                                                                                                                                                                       | Slowness in Eating     | Lentitud para comer       | Mi bebe se termina sus tetadas/tomas rápidamente*<br>A mi bebe le toma más de 30 minutos terminar de comer/ su tetada<br>Mi bebe es lento para comer<br>Mi bebe succiona cada vez más lento durante el transcurso de una comida/tetad                                                                                                                                                                               |
| My baby has a big appetite                                                                                                                                                                                                                                                                                                                               | General Appetite       | Apetito                   | Mi bebe tiene un gran apetito                                                                                                                                                                                                                                                                                                                                                                                       |

<sup>1</sup> Response option: Never, Rarely, Sometimes, Often, Always. <sup>2</sup> Opción de respuestas: Nunca, Rara vez, Algunas veces, A menudo, Siempre.

**Table S2.** Full set of BEBQ retrospective version and BEBQ-Mex items.

| BEBQ <sup>1</sup>                                                                                                                                                                                                                                                                                                                                              | Subscales              |                           | BEBQ-Mex <sup>2</sup>                                                                                                                                                                                                                                                                                                                                                                                               |
|----------------------------------------------------------------------------------------------------------------------------------------------------------------------------------------------------------------------------------------------------------------------------------------------------------------------------------------------------------------|------------------------|---------------------------|---------------------------------------------------------------------------------------------------------------------------------------------------------------------------------------------------------------------------------------------------------------------------------------------------------------------------------------------------------------------------------------------------------------------|
| Food Approach subscales; Sub-escalas pro-ingestión                                                                                                                                                                                                                                                                                                             |                        |                           |                                                                                                                                                                                                                                                                                                                                                                                                                     |
| My baby frequently wanted more milk than I provided<br>If allowed to, my baby would take too much milk<br>Even when my baby had just eaten well he/she was happy to feed again if offered<br>My baby was always demanding a feed<br>If given the chance, my baby would always be feeding<br>My baby could easily take a feed within 30 minutes of the last one | Food Responsiveness    | Respuesta a los Alimentos | Mi bebé frecuentemente quería más leche de la que puedo darle<br>Si se le permitía, mi bebe tomaba demasiada leche<br>Aun cuando mi bebe había comido bien, estaba contento(a) de volver a comer si se le ofrecía<br>Mi bebe siempre estaba demandando una comida/tetada<br>Si le daba chance, mi bebe siempre estaba comiendo<br>Mi bebe podía fácilmente volver a comer a los 30 minutos de la última tetada/toma |
| My baby seemed contented while feeding<br>My baby loved milk<br>My baby became distressed while feeding<br>My baby enjoyed feeding time                                                                                                                                                                                                                        | Enjoyment of Food      | Disfrute de los Alimentos | Mi bebé parecía contento mientras come<br>A mi bebe le encantaba la leche<br>Mi bebe se angustiaba/afligía mientras come*<br>Mi bebe disfrutaba la hora de comer                                                                                                                                                                                                                                                    |
| Food Avoidance subscales; Sub-escalas anti-ingestión                                                                                                                                                                                                                                                                                                           |                        |                           |                                                                                                                                                                                                                                                                                                                                                                                                                     |
| My baby got full up easily<br>My baby got full before taking all the milk I think he/she should have<br>My baby found it difficult to manage a complete feed                                                                                                                                                                                                   | Satiety Responsiveness | Respuesta a la Saciedad   | Mi bebe se sentía lleno(a) fácilmente<br>Mi bebe se llenaba antes de tomar toda la leche que yo pensaba que debía recibir<br>A mi bebe le costaba trabajo terminarse una tetada/una comida completa                                                                                                                                                                                                                 |
| My baby finished feeding quickly<br>My baby took more than 30 minutes to finish feeding<br>My baby fed slowly<br>My baby sucked more and more slowly during the course of a feed                                                                                                                                                                               | Slowness in Eating     | Lentitud para comer       | Mi bebe se terminaba sus tetadas/tomas rápidamente*<br>A mi bebe le tomaba más de 30 minutos terminar de comer/ su tetada<br>Mi bebe era lento para comer<br>Mi bebe succionaba cada vez más lento durante el transcurso de una comida/tetada                                                                                                                                                                       |
| My baby had a big appetite                                                                                                                                                                                                                                                                                                                                     | General Appetite       | Apetito                   | Mi bebe tenía un gran apetito                                                                                                                                                                                                                                                                                                                                                                                       |

<sup>1</sup> Response option: Never, Rarely, Sometimes, Often, Always. <sup>2</sup> Opción de respuestas: Nunca, Rara vez, Algunas veces, A menudo, Siempre.

**Table S3.** Full set of CEBQ-T and CEBQ-T-Mex items.

| CEBQ-T <sup>1</sup>                                                                                                                                                                                                          | Subscales           |                           | CEBQ-T-Mex <sup>2</sup>                                                                                                                                                                                                                                                                               |
|------------------------------------------------------------------------------------------------------------------------------------------------------------------------------------------------------------------------------|---------------------|---------------------------|-------------------------------------------------------------------------------------------------------------------------------------------------------------------------------------------------------------------------------------------------------------------------------------------------------|
| Food Approach subscales; Sub-escalas pro-ingestión                                                                                                                                                                           |                     |                           |                                                                                                                                                                                                                                                                                                       |
| My child is always asking for food<br>If allowed to, my child would eat too much<br>Given the choice, my child would eat most of the time<br>Even when my child has just eaten well, he/she is happy to eat again if offered | Food Responsiveness | Respuesta a los Alimentos | Mi hijo(a) siempre está pidiendo más comida<br>Si se le permitiera, mi hijo(a) comería demasiado<br>Si mi hijo pudiera escoger, se la pasaría comiendo la mayor parte del tiempo<br>Aun cuando mi hijo(a) haya comido bien, el/ella estaría contento(a) de volver a comer si se le ofreciera alimento |

|                                                                                                                                                                                                                                                                                                                               |                        |                              |                                                                                                                                                                                                                                                                                                                                                                       |
|-------------------------------------------------------------------------------------------------------------------------------------------------------------------------------------------------------------------------------------------------------------------------------------------------------------------------------|------------------------|------------------------------|-----------------------------------------------------------------------------------------------------------------------------------------------------------------------------------------------------------------------------------------------------------------------------------------------------------------------------------------------------------------------|
| My child eats more when irritable<br>My child eats more when grumpy<br>My child eats more when upset                                                                                                                                                                                                                          | Emotional over-eating  | Sobre-Alimentación Emocional | Mi hijo(a) come más cuando está enfadado(a)<br>Mi hijo(a) come más cuando esta malhumorado(a)<br>Mi hijo(a) come más cuando está molesto(a)                                                                                                                                                                                                                           |
| My child loves food<br>My child is interested in food<br>My child looks forward to mealtimes<br>My child enjoys eating                                                                                                                                                                                                        | Enjoyment of Food      | Disfrute de los Alimentos    | A mi hijo(a) le encanta la comida<br>Mi hijo(a) está interesado en la comida<br>Mi hijo(a) espera con ganas la hora de las comidas<br>Mi hijo(a) disfruta comer                                                                                                                                                                                                       |
| <b>Food Avoidance subscales; Sub-escalas anti-ingestión</b>                                                                                                                                                                                                                                                                   |                        |                              |                                                                                                                                                                                                                                                                                                                                                                       |
| My child has a big appetite*<br>My child cannot eat a meal if he/she has had a snack just before<br>My child leaves food on his/her plate or in the jar at the end of a meal<br>My child gets full before his/her meal is finished<br>My child gets full up easily                                                            | Satiety Responsiveness | Respuesta a la Saciedad      | Mi hijo(a) tiene un gran apetito*<br>Mi hijo(a) no come a la hora de la comida si recibió un bocadillo justo antes<br><br>Mi hijo(a) deja alimentos en su plato o en su taza al final de una comida<br>Mi hijo(a) se siente lleno(a) antes de que termine su comida<br>Mi hijo(a) se siente lleno(a)/satisfecho(a), muy fácilmente                                    |
| My child refuses new foods at first<br>My child enjoys a wide variety of foods*<br><br>My child enjoys tasting new foods*<br>My child is difficult to please with meals<br>My child decides that he/she does not like a food, even without tasting it<br>My child is interested in tasting food he/she has not tasted before* | Food Fussiness         | Actitud remilgosa            | Al principio mi hijo(a) rechaza nuevos alimentos<br>Mi hijo(a) disfruta de una gran variedad de alimentos*<br>A mi hijo(a) le gusta probar alimentos nuevos*<br>Mi hijo(a) es difícil de complacer con alimentos<br><br>Mi hijo(a) decide que no le gusta un alimento, antes de probarlo<br>A mi hijo(a) le interesa probar alimentos nuevos que no ha probado antes* |
| My child finishes his/her meal quickly*<br>My child eats slowly<br>My child takes more than 30 minutes to finish a meal<br>My child eats more and more slowly during the course of a meal                                                                                                                                     | Slowness in Eating     | Lentitud para comer          | Mi hijo(a) termina sus alimentos rápidamente*<br>Mi hijo(a) es lento para comer<br>A mi hijo(a) le toma más de 30 minutos terminar sus alimentos<br>Mi hijo(a) come cada vez más lento durante el transcurso de una comida                                                                                                                                            |

<sup>1</sup> Response option: Strongly disagree, Disagree, Neither agree nor disagree, Agree, Strongly agree. <sup>2</sup> Opción de respuestas: Muy en desacuerdo, En desacuerdo, Ni en acuerdo ni en desacuerdo, En acuerdo, Muy en acuerdo.

## Supplementary Information S2

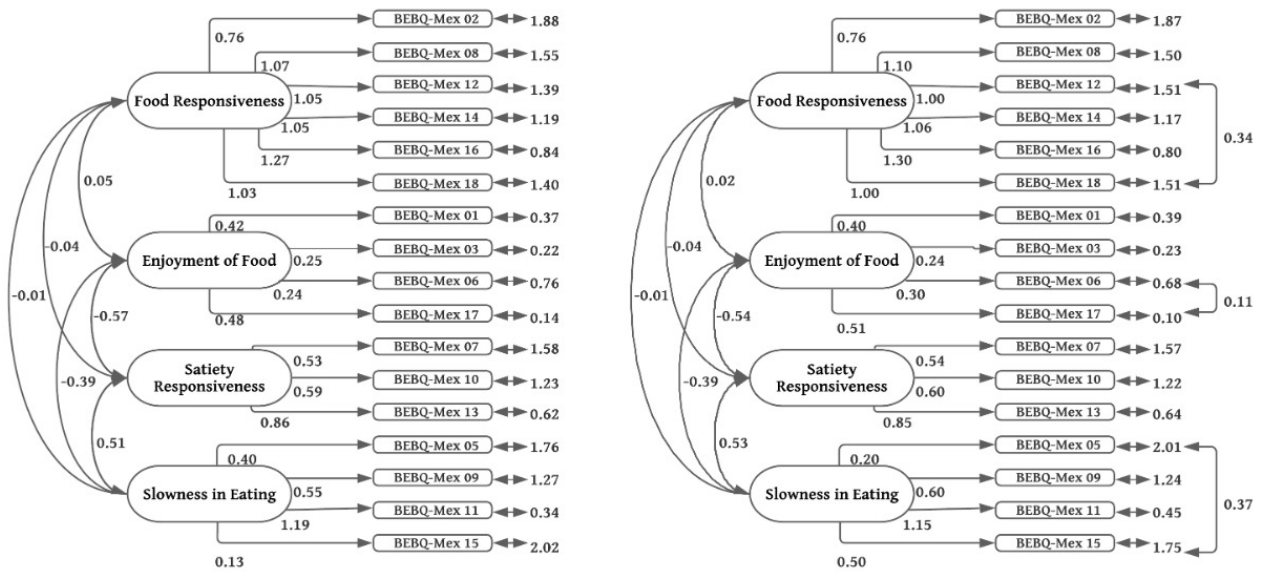

**Figure S1.** Path diagram of the four-factor models of the BEBQ-Mex with standardized estimates (factor-factor loadings, item squares multiple correlations and error-covariances) fitted in a sample of 330 mother-infant dyads (Model 1: left panel, Model 2: right panel).

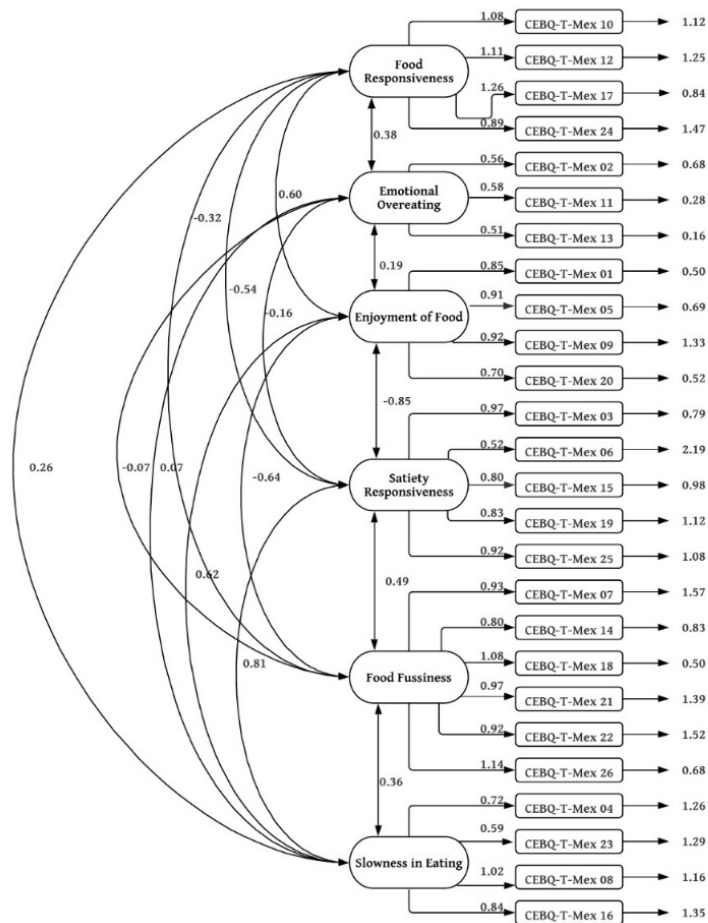

**Figure S2.** Path diagram of the six-factor model of the CEBQ-T-Mex with standardized estimates (factor-factor loadings, item squares multiple correlations and error-covariances) fitted in a sample of 330 mother-toddler dyads.

Results of the correlations between BEBQ-Mex subscales and BMI-z in infants revealed after adjusting for sex, age and feeding type, that those infants with greater response to food, had lower BMI-z, in direct opposition to results found in different studies [13,33,34] possibly pointing to the misinterpretation of the child's external cues [30]. This signals the need to address these issues and better educate mothers in a responsive feeding narrative [32]. Slowness in Eating, whose difficulties in showing good values of internal reliability, was negatively correlated to BMI-z after adjustment by age, sex and feeding type. These results have been replicated in several studies [13,23,33,34]. Infants with a more avid appetite tended to have a higher BMI-z. This last result was the only one observed in the Mexican study of 40 infants under the age of 6 months [17] (Table S4).

Toddlers with a greater enjoyment of food, who are unable to recognize their internal satiety cues and are not fussy eaters, tend to show increased weight. [36] have shown direct correlations with Food Responsiveness and inverse correlations with Satiety Responsiveness and Slowness in Eating and BMI-z scores in a prospective study of 210 infants followed prospectively from birth until 24 months of age in Singapore [36], similar to those found in our study. These results therefore suggest better interpretations of the toddlers' satiety cues by the mothers.

**Table S4.** Linear regressions between Infant and Toddler's appetitive traits and BMI-z adjusting by sex, age and feeding type.

| Subscales              | Infant BMI-z        |                                          | Toddler BMI-z           |                                          |
|------------------------|---------------------|------------------------------------------|-------------------------|------------------------------------------|
|                        | $\beta$<br>95% CI   | Adjusted- $\beta$ <sup>1</sup><br>95% CI | $\beta$<br>95% CI       | Adjusted- $\beta$ <sup>1</sup><br>95% CI |
| Food Responsiveness    | -0.03 (-0.07, 0.12) | -0.002 (-0.10, 0.09)                     | 0.02 (-0.10, 0.14)      | 0.04 (-0.08, 0.16)                       |
| Emotional Overeating   |                     | NA                                       | 0.05 (-0.02, 0.12)      | 0.05 (-0.02, 0.12)                       |
| Enjoyment of Food      | 0.03 (-0.01, 0.07)  | 0.02 (-0.01, 0.06)                       | 0.091 (-0.003, 0.19)    | 0.13 (0.03, 0.22) **                     |
| Satiety Responsiveness | 0.01 (-0.06, 0.09)  | -0.01 (-0.09, 0.06)                      | -0.13 (-0.22, -0.04) ** | -0.15 (-0.24, -0.05) **                  |
| Food Fussiness         |                     | NA                                       | -0.03 (0.13, 0.08)      | -0.07 (-0.17, 0.04)                      |
| Slowness in Eating     | -0.05 (-0.12, 0.02) | -0.07 (-0.13, -0.001) *                  | -0.02 (-0.07, 0.04)     | -0.03 (-0.08, 0.03)                      |
| General Appetite       | 0.10 (0.02, 0.18) * | 0.09 (0.01, 0.17) *                      | NA                      |                                          |

<sup>1</sup> Adjusted by sex, age, feeding type. CI = Confidence Interval. \* Correlation is significant at the 0.05 level (2-tailed). \*\* Correlation is significant at the 0.01 level (2-tailed).
